# Supplementary material for: Host-Defense Peptides Caerin 1.1 and 1.9 Stimulate TNF-Alpha-Dependent Apoptotic Signals in Human Cervical Cancer HeLa Cells
Source: Front Cell Dev Biol. 2020 Jul 31;8:676. doi: 10.3389/fcell.2020.00676 (PMC7412766; doi:10.3389/fcell.2020.00676)
Supplement: TABLE S7 — The enrichments of biological processes and pathways of significantly regulated proteins identified in HeLa cell environment post the treatments. [file Table_7.XLSX]

## Sheet: supernatant_annotations
queryItem	stringId	preferredName	annotation
ANT3	9606.ENSP00000370808	SLC25A6	ADP/ATP translocase 3; Catalyzes the exchange of cytoplasmic ADP with mitochondrial ATP across the mitochondrial inner membrane. May participate in the formation of the permeability transition pore complex (PTPC) responsible for the release of mitochondrial products that triggers apoptosis; Belongs to the mitochondrial carrier (TC 2.A.29) family
A1AT	9606.ENSP00000416066	SERPINA1	Alpha-1-antitrypsin; Inhibitor of serine proteases. Its primary target is elastase, but it also has a moderate affinity for plasmin and thrombin. Irreversibly inhibits trypsin, chymotrypsin and plasminogen activator. The aberrant form inhibits insulin-induced NO synthesis in platelets, decreases coagulation time and has proteolytic activity against insulin and plasmin; Belongs to the serpin family
CO3	9606.ENSP00000354982	MT-CO3	Cytochrome c oxidase subunit 3; Subunits I, II and III form the functional core of the enzyme complex; Mitochondrial complex IV: cytochrome c oxidase subunits
KNG1	9606.ENSP00000265023	KNG1	Kininogen-1; (1) Kininogens are inhibitors of thiol proteases; (2) HMW-kininogen plays an important role in blood coagulation by helping to position optimally prekallikrein and factor XI next to factor XII; (3) HMW-kininogen inhibits the thrombin- and plasmin- induced aggregation of thrombocytes; (4) the active peptide bradykinin that is released from HMW-kininogen shows a variety of physiologica…
APOA1	9606.ENSP00000236850	APOA1	Apolipoprotein A-I; Participates in the reverse transport of cholesterol from tissues to the liver for excretion by promoting cholesterol efflux from tissues and by acting as a cofactor for the lecithin cholesterol acyltransferase (LCAT). As part of the SPAP complex, activates spermatozoa motility; Apolipoproteins
APOH	9606.ENSP00000205948	APOH	Beta-2-glycoprotein 1; Binds to various kinds of negatively charged substances such as heparin, phospholipids, and dextran sulfate. May prevent activation of the intrinsic blood coagulation cascade by binding to phospholipids on the surface of damaged cells; Apolipoproteins
FETUA	9606.ENSP00000393887	AHSG	Alpha-2-HS-glycoprotein; Promotes endocytosis, possesses opsonic properties and influences the mineral phase of bone. Shows affinity for calcium and barium ions; Cystatins, type 4
FETA	9606.ENSP00000379138	AFP	Alpha-fetoprotein; Binds copper, nickel, and fatty acids as well as, and bilirubin less well than, serum albumin. Only a small percentage (less than 2%) of the human AFP shows estrogen-binding properties; Belongs to the ALB/AFP/VDB family
HEMO	9606.ENSP00000460602	ERVMER34-1	Endogenous retrovirus group MER34 member 1 Env polyprotein; Retroviral envelope proteins mediate receptor recognition and membrane fusion during early infection. Endogenous envelope proteins may have kept, lost or modified their original function during evolution (By similarity); Envelope ERV derived genes
GELS	9606.ENSP00000361867	SEMG1	Semenogelin-1; Predominant protein in semen. It participates in the formation of a gel matrix entrapping the accessory gland secretions and ejaculated spermatozoa. Fragments of semenogelin and/or fragments of the related proteins may contribute to the activation of progressive sperm movements as the gel-forming proteins are fragmented by KLK3/PSA
A2AP	9606.ENSP00000321853	SERPINF2	Alpha-2-antiplasmin; Serine protease inhibitor. The major targets of this inhibitor are plasmin and trypsin, but it also inactivates matriptase-3/TMPRSS7 and chymotrypsin; Serpin peptidase inhibitors
ITIH2	9606.ENSP00000351190	ITIH2	Inter-alpha-trypsin inhibitor heavy chain H2; May act as a carrier of hyaluronan in serum or as a binding protein between hyaluronan and other matrix protein, including those on cell surfaces in tissues to regulate the localization, synthesis and degradation of hyaluronan which are essential to cells undergoing biological processes; Belongs to the ITIH family
ITIH1	9606.ENSP00000273283	ITIH1	Inter-alpha-trypsin inhibitor heavy chain H1; May act as a carrier of hyaluronan in serum or as a binding protein between hyaluronan and other matrix protein, including those on cell surfaces in tissues to regulate the localization, synthesis and degradation of hyaluronan which are essential to cells undergoing biological processes
PZP	9606.ENSP00000261336	PZP	Pregnancy zone protein; Is able to inhibit all four classes of proteinases by a unique 'trapping' mechanism. This protein has a peptide stretch, called the 'bait region' which contains specific cleavage sites for different proteinases. When a proteinase cleaves the bait region, a conformational change is induced in the protein which traps the proteinase. The entrapped enzyme remains active agains…
FBLN1	9606.ENSP00000331544	FBLN1	Fibulin-1; Incorporated into fibronectin-containing matrix fibers. May play a role in cell adhesion and migration along protein fibers within the extracellular matrix (ECM). Could be important for certain developmental processes and contribute to the supramolecular organization of ECM architecture, in particular to those of basement membranes. Has been implicated in a role in cellular transformat…
PEDF	9606.ENSP00000254722	SERPINF1	Pigment epithelium-derived factor; Neurotrophic protein; induces extensive neuronal differentiation in retinoblastoma cells. Potent inhibitor of angiogenesis. As it does not undergo the S (stressed) to R (relaxed) conformational transition characteristic of active serpins, it exhibits no serine protease inhibitory activity; Serpin peptidase inhibitors
HBB	9606.ENSP00000333994	HBB	Hemoglobin subunit beta; Involved in oxygen transport from the lung to the various peripheral tissues; Belongs to the globin family
HBA	9606.ENSP00000364586	SCN2A	Sodium channel protein type 2 subunit alpha; Mediates the voltage-dependent sodium ion permeability of excitable membranes. Assuming opened or closed conformations in response to the voltage difference across the membrane, the protein forms a sodium-selective channel through which Na(+) ions may pass in accordance with their electrochemical gradient; Belongs to the sodium channel (TC 1.A.1.10) fa…
PPARD	9606.ENSP00000310928	PPARD	Peroxisome proliferator-activated receptor delta; Ligand-activated transcription factor. Receptor that binds peroxisome proliferators such as hypolipidemic drugs and fatty acids. Has a preference for poly-unsaturated fatty acids, such as gamma-linoleic acid and eicosapentanoic acid. Once activated by a ligand, the receptor binds to promoter elements of target genes. Regulates the peroxisomal beta…
ITIH3	9606.ENSP00000415769	ITIH3	Inter-alpha-trypsin inhibitor heavy chain H3; May act as a carrier of hyaluronan in serum or as a binding protein between hyaluronan and other matrix protein, including those on cell surfaces in tissues to regulate the localization, synthesis and degradation of hyaluronan which are essential to cells undergoing biological processes
ANK3	9606.ENSP00000280772	ANK3	Ankyrin-3; In skeletal muscle, required for costamere localization of DMD and betaDAG1 (By similarity). Membrane-cytoskeleton linker. May participate in the maintenance/targeting of ion channels and cell adhesion molecules at the nodes of Ranvier and axonal initial segments. Regulates KCNA1 channel activity in function of dietary Mg(2+) levels, and thereby contributes to the regulation of renal M…
ITIH4	9606.ENSP00000266041	ITIH4	Inter-alpha-trypsin inhibitor heavy chain H4; Type II acute-phase protein (APP) involved in inflammatory responses to trauma. May also play a role in liver development or regeneration
OR5A2	9606.ENSP00000303834	OR5A2	Olfactory receptor 5A2; Odorant receptor; Olfactory receptors, family 5
HMCN1	9606.ENSP00000271588	HMCN1	Hemicentin-1; Promotes cleavage furrow maturation during cytokinesis in preimplantation embryos. May play a role in the architecture of adhesive and flexible epithelial cell junctions. May play a role during myocardial remodeling by imparting an effect on cardiac fibroblast migration; Fibulins
ACOXL	9606.ENSP00000407761	ACOXL	Acyl-coenzyme A oxidase-like protein; acyl-CoA oxidase like; Belongs to the acyl-CoA oxidase family
TMOD2	9606.ENSP00000249700	TMOD2	Tropomodulin-2; Blocks the elongation and depolymerization of the actin filaments at the pointed end. The Tmod/TM complex contributes to the formation of the short actin protofilament, which in turn defines the geometry of the membrane skeleton (By similarity); Tropomodulins
ASAP1	9606.ENSP00000429900	ASAP1	Arf-GAP with SH3 domain, ANK repeat and PH domain-containing protein 1; Possesses phosphatidylinositol 4,5-bisphosphate- dependent GTPase-activating protein activity for ARF1 (ADP ribosylation factor 1) and ARF5 and a lesser activity towards ARF6. May coordinate membrane trafficking with cell growth or actin cytoskeleton remodeling by binding to both SRC and PIP2. May function as a signal transdu…
B7WNR0	9606.ENSP00000295897	ALB	Serum albumin; Serum albumin, the main protein of plasma, has a good binding capacity for water, Ca(2+), Na(+), K(+), fatty acids, hormones, bilirubin and drugs. Its main function is the regulation of the colloidal osmotic pressure of blood. Major zinc transporter in plasma, typically binds about 80% of all plasma zinc; Belongs to the ALB/AFP/VDB family
C9JVG0	9606.ENSP00000385834	TF	Serotransferrin; Transferrins are iron binding transport proteins which can bind two Fe(3+) ions in association with the binding of an anion, usually bicarbonate. It is responsible for the transport of iron from sites of absorption and heme degradation to those of storage and utilization. Serum transferrin may also have a further role in stimulating cell proliferation
D6RBJ7	9606.ENSP00000421725	GC	Vitamin D-binding protein; Involved in vitamin D transport and storage, scavenging of extracellular G-actin, enhancement of the chemotactic activity of C5 alpha for neutrophils in inflammation and macrophage activation
D6RF20	9606.ENSP00000421725	GC	Vitamin D-binding protein; Involved in vitamin D transport and storage, scavenging of extracellular G-actin, enhancement of the chemotactic activity of C5 alpha for neutrophils in inflammation and macrophage activation
E7ET33	9606.ENSP00000415769	ITIH3	Inter-alpha-trypsin inhibitor heavy chain H3; May act as a carrier of hyaluronan in serum or as a binding protein between hyaluronan and other matrix protein, including those on cell surfaces in tissues to regulate the localization, synthesis and degradation of hyaluronan which are essential to cells undergoing biological processes
F8W696	9606.ENSP00000236850	APOA1	Apolipoprotein A-I; Participates in the reverse transport of cholesterol from tissues to the liver for excretion by promoting cholesterol efflux from tissues and by acting as a cofactor for the lecithin cholesterol acyltransferase (LCAT). As part of the SPAP complex, activates spermatozoa motility; Apolipoproteins
G3V1N2	9606.ENSP00000251595	HBA2	Hemoglobin subunit alpha 2; Involved in oxygen transport from the lung to the various peripheral tissues; Hemoglobin subunits
H7C013	9606.ENSP00000295897	ALB	Serum albumin; Serum albumin, the main protein of plasma, has a good binding capacity for water, Ca(2+), Na(+), K(+), fatty acids, hormones, bilirubin and drugs. Its main function is the regulation of the colloidal osmotic pressure of blood. Major zinc transporter in plasma, typically binds about 80% of all plasma zinc; Belongs to the ALB/AFP/VDB family
I3L1U4	9606.ENSP00000254722	SERPINF1	Pigment epithelium-derived factor; Neurotrophic protein; induces extensive neuronal differentiation in retinoblastoma cells. Potent inhibitor of angiogenesis. As it does not undergo the S (stressed) to R (relaxed) conformational transition characteristic of active serpins, it exhibits no serine protease inhibitory activity; Serpin peptidase inhibitors
I3L2R7	9606.ENSP00000254722	SERPINF1	Pigment epithelium-derived factor; Neurotrophic protein; induces extensive neuronal differentiation in retinoblastoma cells. Potent inhibitor of angiogenesis. As it does not undergo the S (stressed) to R (relaxed) conformational transition characteristic of active serpins, it exhibits no serine protease inhibitory activity; Serpin peptidase inhibitors
M0QYC8	9606.ENSP00000245907	C3	Complement C3; C3 plays a central role in the activation of the complement system. Its processing by C3 convertase is the central reaction in both classical and alternative complement pathways. After activation C3b can bind covalently, via its reactive thioester, to cell surface carbohydrates or immune aggregates; C3 and PZP like, alpha-2-macroglobulin domain containing
Q5T987	9606.ENSP00000351190	ITIH2	Inter-alpha-trypsin inhibitor heavy chain H2; May act as a carrier of hyaluronan in serum or as a binding protein between hyaluronan and other matrix protein, including those on cell surfaces in tissues to regulate the localization, synthesis and degradation of hyaluronan which are essential to cells undergoing biological processes; Belongs to the ITIH family
Q8TCE1	9606.ENSP00000356671	SERPINC1	Antithrombin-III; Most important serine protease inhibitor in plasma that regulates the blood coagulation cascade. AT-III inhibits thrombin, matriptase-3/TMPRSS7, as well as factors IXa, Xa and XIa. Its inhibitory activity is greatly enhanced in the presence of heparin; Serpin peptidase inhibitors
AACT	9606.ENSP00000450540	AACT	Alpha-1-antichymotrypsin; Although its physiological function is unclear, it can inhibit neutrophil cathepsin G and mast cell chymase, both of which can convert angiotensin-1 to the active angiotensin-2; Serpin peptidase inhibitors
MT1E	9606.ENSP00000307706	MT1E	Metallothionein-1E; Metallothioneins have a high content of cysteine residues that bind various heavy metals; these proteins are transcriptionally regulated by both heavy metals and glucocorticoids; Belongs to the metallothionein superfamily. Type 1 family
MT1F	9606.ENSP00000334872	MT1F	Metallothionein-1F; Metallothioneins have a high content of cysteine residues that bind various heavy metals; these proteins are transcriptionally regulated by both heavy metals and glucocorticoids; Belongs to the metallothionein superfamily. Type 1 family
CSTF2	9606.ENSP00000362063	CSTF2	Cleavage stimulation factor subunit 2; One of the multiple factors required for polyadenylation and 3'-end cleavage of mammalian pre-mRNAs. This subunit is directly involved in the binding to pre-mRNAs (By similarity)
OBSCN	9606.ENSP00000455507	OBSCN	Obscurin, cytoskeletal calmodulin and titin-interacting RhoGEF; Fibronectin type III domain containing
CD109	9606.ENSP00000287097	CD109	CD109 antigen; Modulates negatively TGFB1 signaling in keratinocytes; Belongs to the protease inhibitor I39 (alpha-2- macroglobulin) family
KDM3B	9606.ENSP00000326563	KDM3B	Lysine-specific demethylase 3B; Histone demethylase that specifically demethylates 'Lys- 9' of histone H3, thereby playing a central role in histone code. Demethylation of Lys residue generates formaldehyde and succinate. May have tumor suppressor activity; Lysine demethylases
WDFY3	9606.ENSP00000295888	WDFY3	WD repeat and FYVE domain-containing protein 3; Required for selective macroautophagy (aggrephagy). Acts as an adapter protein by linking specific proteins destined for degradation to the core autophagic machinery members, such as the ATG5-ATG12-ATG16L E3-like ligase, SQSTM1 and LC3. Along with p62/SQSTM1, involved in the formation and autophagic degradation of cytoplasmic ubiquitin- containing i…
CAR10	9606.ENSP00000357668	ADAM12	Disintegrin and metalloproteinase domain-containing protein 12; Involved in skeletal muscle regeneration, specifically at the onset of cell fusion. Also involved in macrophage-derived giant cells (MGC) and osteoclast formation from mononuclear precursors (By similarity); ADAM metallopeptidase domain containing
GRIP2	9606.ENSP00000480660	GRIP2	Glutamate receptor-interacting protein 2; May play a role as a localized scaffold for the assembly of a multiprotein signaling complex and as mediator of the trafficking of its binding partners at specific subcellular location in neurons; PDZ domain containing
SCML1	9606.ENSP00000369380	SCML1	Sex comb on midleg-like protein 1; Putative Polycomb group (PcG) protein. PcG proteins act by forming multiprotein complexes, which are required to maintain the transcriptionally repressive state of homeotic genes throughout development. May be involved in spermatogenesis during sexual maturation (By similarity); Sterile alpha motif domain containing
AMBP	9606.ENSP00000265132	AMBP	Protein AMBP; Inter-alpha-trypsin inhibitor inhibits trypsin, plasmin, and lysosomal granulocytic elastase. Inhibits calcium oxalate crystallization; Lipocalins
APOA	9606.ENSP00000321334	LPA	Apolipoprotein(a); Apo(a) is the main constituent of lipoprotein(a) (Lp(a)). It has serine proteinase activity and is able of autoproteolysis. Inhibits tissue-type plasminogen activator 1. Lp(a) may be a ligand for megalin/Gp 330; Belongs to the peptidase S1 family. Plasminogen subfamily
MAP4	9606.ENSP00000353375	MAP4	Microtubule-associated protein 4; Non-neuronal microtubule-associated protein. Promotes microtubule assembly
TAP1	9606.ENSP00000346206	TAP1	Antigen peptide transporter 1; Involved in the transport of antigens from the cytoplasm to the endoplasmic reticulum for association with MHC class I molecules. Also acts as a molecular scaffold for the final stage of MHC class I folding, namely the binding of peptide. Nascent MHC class I molecules associate with TAP via tapasin. Inhibited by the covalent attachment of herpes simplex virus ICP47 …
ZFHX4	9606.ENSP00000430497	ZFHX4	Zinc finger homeobox protein 4; May play a role in neural and muscle differentiation (By similarity). May be involved in transcriptional regulation; ZF class homeoboxes and pseudogenes
AKAP9	9606.ENSP00000348573	AKAP9	A-kinase anchor protein 9; Scaffolding protein that assembles several protein kinases and phosphatases on the centrosome and Golgi apparatus. Required to maintain the integrity of the Golgi apparatus. Recruited to the Golgi apparatus by GM130/GOLGA2 and is required for microtubule nucleation at the cis-side of the Golgi apparatus. Required for association of the centrosomes with the poles of the …
SACS	9606.ENSP00000371735	SACS	Sacsin; Co-chaperone which acts as a regulator of the Hsp70 chaperone machinery and may be involved in the processing of other ataxia-linked proteins; DNAJ heat shock proteins
H7C0N0	9606.ENSP00000273283	ITIH1	Inter-alpha-trypsin inhibitor heavy chain H1; May act as a carrier of hyaluronan in serum or as a binding protein between hyaluronan and other matrix protein, including those on cell surfaces in tissues to regulate the localization, synthesis and degradation of hyaluronan which are essential to cells undergoing biological processes
VNN1	9606.ENSP00000356905	VNN1	Pantetheinase; Amidohydrolase that hydrolyzes specifically one of the carboamide linkages in D-pantetheine thus recycling pantothenic acid (vitamin B5) and releasing cysteamine; Belongs to the carbon-nitrogen hydrolase superfamily. BTD/VNN family
APOB	9606.ENSP00000233242	APOB	Apolipoprotein B-100; Apolipoprotein B is a major protein constituent of chylomicrons (apo B-48), LDL (apo B-100) and VLDL (apo B-100). Apo B-100 functions as a recognition signal for the cellular binding and internalization of LDL particles by the apoB/E receptor; Apolipoproteins
FBXW9	9606.ENSP00000376945	FBXW9	F-box/WD repeat-containing protein 9; Substrate-recognition component of the SCF (SKP1-CUL1-F- box protein)-type E3 ubiquitin ligase complex; F-box and WD repeat domain containing
NINL	9606.ENSP00000278886	NINL	Ninein-like protein; Involved in the microtubule organization in interphase cells. Overexpression induces the fragmentation of the Golgi, and causes lysosomes to disperse toward the cell periphery; it also interferes with mitotic spindle assembly. May play a role in ovarian carcinogenesis; EF-hand domain containing
SNX14	9606.ENSP00000313121	SNX14	Sorting nexin-14; Plays a role in maintaining normal neuronal excitability and synaptic transmission. May be involved in several stages of intracellular trafficking (By similarity). Required for autophagosome clearance, possibly by mediating the fusion of lysosomes with autophagosomes (Probable). Binds phosphatidylinositol 3,5-bisphosphate (PtdIns(3,5)P2), a key component of late endosomes/lysoso…
F8W6P5	9606.ENSP00000333994	HBB	Hemoglobin subunit beta; Involved in oxygen transport from the lung to the various peripheral tissues; Belongs to the globin family

## Sheet: caerin 1.1_up_BP_enrichment
ID	Name	Source	pValue	FDR B&H	FDR B&Y	Bonferroni	Genes from Input	Genes in Annotation
1	GO:0010951	negative regulation of endopeptidase activity		8.366e-09	7.858e-06	6.084e-05	1.082e-05	8	245
2	GO:0010466	negative regulation of peptidase activity		1.215e-08	7.858e-06	6.084e-05	1.572e-05	8	257
3	GO:0045861	negative regulation of proteolysis		1.864e-07	8.032e-05	0.0006219	0.000241	8	366
4	GO:0052548	regulation of endopeptidase activity		3.205e-07	0.0001036	0.000802	0.0004144	8	393
5	GO:0052547	regulation of peptidase activity		4.932e-07	0.0001082	0.000838	0.0006377	8	416
6	GO:0051346	negative regulation of hydrolase activity		5.022e-07	0.0001082	0.000838	0.0006494	8	417
7	GO:0032269	negative regulation of cellular protein metabolic process		1.447e-05	0.002452	0.01898	0.01872	10	1112
8	GO:0043086	negative regulation of catalytic activity		1.517e-05	0.002452	0.01898	0.01962	9	877
9	GO:1903035	negative regulation of response to wounding		1.735e-05	0.002493	0.0193	0.02244	5	185
10	GO:0044092	negative regulation of molecular function		2.045e-05	0.002644	0.02047	0.02644	10	1157
11	GO:0051248	negative regulation of protein metabolic process		2.479e-05	0.002914	0.02256	0.03205	10	1183

## Sheet: caerin1.1_up_pathway
ID	Name	Source	pValue	FDR B&H	FDR B&Y	Bonferroni	Genes from Input	Genes in Annotation
1	M3468	Genes encoding enzymes and their regulators involved in the remodeling of the extracellular matrix	MSigDB C2 BIOCARTA (v6.0)	6.455e-08	1.691e-05	0.000104	1.691e-05	8	238
2	SMP00274	Heparin Pathway	SMPDB	1.005e-05	0.0005205	0.0032	0.002634	3	18
3	SMP00273	Fondaparinux Pathway	SMPDB	1.005e-05	0.0005205	0.0032	0.002634	3	18
4	SMP00275	Ardeparin Pathway	SMPDB	1.005e-05	0.0005205	0.0032	0.002634	3	18
5	SMP00272	Enoxaparin Pathway	SMPDB	1.005e-05	0.0005205	0.0032	0.002634	3	18
6	1269898	Scavenging of heme from plasma	BioSystems: REACTOME	1.192e-05	0.0005205	0.0032	0.003123	3	19
7	83073	Complement and coagulation cascades	BioSystems: KEGG	3.63e-05	0.001359	0.008352	0.009511	4	79
8	M5885	Ensemble of genes encoding ECM-associated proteins including ECM-affilaited proteins, ECM regulators and secreted factors	MSigDB C2 BIOCARTA (v6.0)	4.664e-05	0.001528	0.009391	0.01222	9	753
9	M5889	Ensemble of genes encoding extracellular matrix and extracellular matrix-associated proteins	MSigDB C2 BIOCARTA (v6.0)	9.148e-05	0.002663	0.01637	0.02397	10	1028
10	P00011	Blood coagulation	PantherDB	0.0001175	0.003077	0.01892	0.03077	3	4

## Sheet: cae1.1_down_BP_enrichment
	ID	Name	pValue	FDR B&H	FDR B&Y	Bonferroni	Genes from Input	Genes in Annotation
1	GO:0052547	regulation of peptidase activity	5.774e-09	4.59e-06	3.331e-05	4.59e-06	8	416
2	GO:2000427	positive regulation of apoptotic cell clearance	5.911e-08	2.35e-05	0.0001705	4.699e-05	3	8
3	GO:0052548	regulation of endopeptidase activity	1.081e-07	2.764e-05	0.0002005	8.592e-05	7	393
4	GO:0010951	negative regulation of endopeptidase activity	1.62e-07	2.764e-05	0.0002005	0.0001288	6	245
5	GO:2000425	regulation of apoptotic cell clearance	1.738e-07	2.764e-05	0.0002005	0.0001382	3	11
6	GO:0010466	negative regulation of peptidase activity	2.147e-07	2.845e-05	0.0002065	0.0001707	6	257
7	GO:0030162	regulation of proteolysis	6.037e-07	6.857e-05	0.0004975	0.00048	8	760
8	GO:0045861	negative regulation of proteolysis	1.698e-06	0.0001688	0.001225	0.00135	6	366
9	GO:0070613	regulation of protein processing	2.434e-06	0.0002022	0.001467	0.001935	4	91
10	GO:1903317	regulation of protein maturation	2.543e-06	0.0002022	0.001467	0.002022	4	92
11	GO:0051346	negative regulation of hydrolase activity	3.611e-06	0.000261	0.001894	0.002871	6	417
12	GO:0051336	regulation of hydrolase activity	5.177e-06	0.000341	0.002474	0.004116	9	1379
13	GO:0072376	protein activation cascade	5.576e-06	0.000341	0.002474	0.004433	4	112
14	GO:0030449	regulation of complement activation	6.205e-06	0.0003524	0.002557	0.004933	3	34
15	GO:2000257	regulation of protein activation cascade	7.394e-06	0.0003674	0.002666	0.005878	3	36
16	GO:0043277	apoptotic cell clearance	7.394e-06	0.0003674	0.002666	0.005878	3	36
17	GO:0002526	acute inflammatory response	2.228e-05	0.001042	0.007561	0.01771	4	159
18	GO:0002920	regulation of humoral immune response	3.147e-05	0.001387	0.01006	0.02502	3	58
19	GO:0050766	positive regulation of phagocytosis	3.314e-05	0.001387	0.01006	0.02634	3	59
20	GO:0006958	complement activation, classical pathway	4.037e-05	0.001605	0.01164	0.03209	3	63
21	GO:0009611	response to wounding	4.252e-05	0.00161	0.01168	0.0338	7	967
22	GO:0006897	endocytosis	5.117e-05	0.001849	0.01342	0.04068	6	665

## Sheet: cae1.1_down_pathway
	ID	Name	Source	pValue	FDR B&H	FDR B&Y	Bonferroni	Genes from Input	Genes in Annotation
1	1269248	Activation of C3 and C5	BioSystems: REACTOME	6.352e-11	1.188e-08	6.902e-08	1.188e-08	4	7
2	1269250	Regulation of Complement cascade	BioSystems: REACTOME	3.136e-08	2.932e-06	1.704e-05	5.864e-06	4	27
3	1269242	Initial triggering of complement	BioSystems: REACTOME	5.605e-08	3.494e-06	2.03e-05	1.048e-05	4	31
4	M4732	Lectin Induced Complement Pathway	MSigDB C2 BIOCARTA (v6.0)	3.804e-07	1.779e-05	0.0001034	7.114e-05	3	12
5	1269241	Complement cascade	BioSystems: REACTOME	5.534e-07	1.959e-05	0.0001138	0.0001035	4	54
6	M7146	Classical Complement Pathway	MSigDB C2 BIOCARTA (v6.0)	6.285e-07	1.959e-05	0.0001138	0.0001175	3	14
7	M917	Complement Pathway	MSigDB C2 BIOCARTA (v6.0)	1.667e-06	4.452e-05	0.0002587	0.0003116	3	19
8	83073	Complement and coagulation cascades	BioSystems: KEGG	2.579e-06	6.029e-05	0.0003503	0.0004823	4	79
9	172846	Staphylococcus aureus infection	BioSystems: KEGG	4.631e-05	0.0009622	0.005592	0.00866	3	56
10	1270225	Erythrocytes take up oxygen and release carbon dioxide	BioSystems: REACTOME	5.545e-05	0.001037	0.006026	0.01037	2	9
11	1269203	Innate Immune System	BioSystems: REACTOME	8.814e-05	0.001493	0.008678	0.01648	8	1312
12	218111	Pertussis	BioSystems: KEGG	0.0001156	0.001493	0.008678	0.02162	3	76
13	1270223	O2/CO2 exchange in erythrocytes	BioSystems: REACTOME	0.0001198	0.001493	0.008678	0.0224	2	13
14	M19553	Hemoglobin's Chaperone	MSigDB C2 BIOCARTA (v6.0)	0.0001198	0.001493	0.008678	0.0224	2	13
15	1270224	Erythrocytes take up carbon dioxide and release oxygen	BioSystems: REACTOME	0.0001198	0.001493	0.008678	0.0224	2	13
16	1269898	Scavenging of heme from plasma	BioSystems: REACTOME	0.0002614	0.003056	0.01776	0.04889	2	19

## Sheet: cae1.9_up_BP_enrichment
	ID	Name	pValue	FDR B&H	FDR B&Y	Bonferroni	Genes from Input	Genes in Annotation
1	GO:0010951	negative regulation of endopeptidase activity	3.328e-08	2.565e-05	0.0001969	4.023e-05	7	245
2	GO:0010466	negative regulation of peptidase activity	4.619e-08	2.565e-05	0.0001969	5.585e-05	7	257
3	GO:0052547	regulation of peptidase activity	6.365e-08	2.565e-05	0.0001969	7.696e-05	8	416
4	GO:0045861	negative regulation of proteolysis	5.098e-07	0.0001469	0.001127	0.0006164	7	366
5	GO:0010035	response to inorganic substance	6.075e-07	0.0001469	0.001127	0.0007345	8	559
6	GO:0052548	regulation of endopeptidase activity	8.221e-07	0.0001656	0.001271	0.0009939	7	393
7	GO:0015671	oxygen transport	1.087e-06	0.0001847	0.001417	0.001314	3	15
8	GO:0051346	negative regulation of hydrolase activity	1.222e-06	0.0001847	0.001417	0.001477	7	417
9	GO:0015669	gas transport	4.2e-06	0.0005642	0.00433	0.005077	3	23
10	GO:0042744	hydrogen peroxide catabolic process	5.444e-06	0.0006195	0.004754	0.006582	3	25
11	GO:0030162	regulation of proteolysis	6.021e-06	0.0006195	0.004754	0.007279	8	760
12	GO:0072378	blood coagulation, fibrin clot formation	6.148e-06	0.0006195	0.004754	0.007433	3	26
13	GO:0032269	negative regulation of cellular protein metabolic process	1.157e-05	0.001076	0.008256	0.01398	9	1112
14	GO:0072376	protein activation cascade	1.673e-05	0.001445	0.01109	0.02023	4	112
15	GO:0051248	negative regulation of protein metabolic process	1.903e-05	0.001534	0.01177	0.02301	9	1183
16	GO:0015701	bicarbonate transport	3.297e-05	0.002491	0.01912	0.03986	3	45

## Sheet: cae1.9_up_pathway
ID	Name	Source	pValue	FDR B&H	FDR B&Y	Bonferroni	Genes from Input	Genes in Annotation
1	1270225	Erythrocytes take up oxygen and release carbon dioxide	BioSystems: REACTOME	3.995e-07	6.058e-05	0.0003579	8.231e-05	3	9
2	1270223	O2/CO2 exchange in erythrocytes	BioSystems: REACTOME	1.354e-06	6.058e-05	0.0003579	0.000279	3	13
3	M19553	Hemoglobin's Chaperone	MSigDB C2 BIOCARTA (v6.0)	1.354e-06	6.058e-05	0.0003579	0.000279	3	13
4	1270224	Erythrocytes take up carbon dioxide and release oxygen	BioSystems: REACTOME	1.354e-06	6.058e-05	0.0003579	0.000279	3	13
5	1269897	Binding and Uptake of Ligands by Scavenger Receptors	BioSystems: REACTOME	1.47e-06	6.058e-05	0.0003579	0.0003029	4	49
6	M3468	Genes encoding enzymes and their regulators involved in the remodeling of the extracellular matrix	MSigDB C2 BIOCARTA (v6.0)	2.645e-06	9.083e-05	0.0005366	0.000545	6	238
7	1269898	Scavenging of heme from plasma	BioSystems: REACTOME	4.557e-06	0.0001341	0.0007922	0.0009386	3	19
8	194384	African trypanosomiasis	BioSystems: KEGG	3.022e-05	0.0007781	0.004597	0.006225	3	35
9	152665	Malaria	BioSystems: KEGG	8.371e-05	0.001916	0.01132	0.01724	3	49
10	M5889	Ensemble of genes encoding extracellular matrix and extracellular matrix-associated proteins	MSigDB C2 BIOCARTA (v6.0)	0.0002352	0.004846	0.02863	0.04846	8	1028

## Sheet: cae1.9_down_BP_enrichment
	ID	Name	pValue	FDR B&H	FDR B&Y	Bonferroni	Genes from Input	Genes in Annotation
1	GO:0052548	regulation of endopeptidase activity	5.864e-09	1.875e-06	1.366e-05	4.808e-06	8	393
2	GO:0010951	negative regulation of endopeptidase activity	6.222e-09	1.875e-06	1.366e-05	5.102e-06	7	245
3	GO:0010466	negative regulation of peptidase activity	8.661e-09	1.875e-06	1.366e-05	7.102e-06	7	257
4	GO:0052547	regulation of peptidase activity	9.145e-09	1.875e-06	1.366e-05	7.499e-06	8	416
5	GO:0045861	negative regulation of proteolysis	9.809e-08	1.609e-05	0.0001172	8.044e-05	7	366
6	GO:0051346	negative regulation of hydrolase activity	2.38e-07	3.252e-05	0.000237	0.0001951	7	417
7	GO:0002526	acute inflammatory response	7.761e-07	9.092e-05	0.0006625	0.0006364	5	159
8	GO:0030162	regulation of proteolysis	9.404e-07	9.639e-05	0.0007024	0.0007712	8	760
9	GO:0002576	platelet degranulation	5.718e-06	0.0005209	0.003796	0.004688	4	107
10	GO:0043086	negative regulation of catalytic activity	3.262e-05	0.002457	0.01791	0.02675	7	877
11	GO:0006953	acute-phase response	3.296e-05	0.002457	0.01791	0.02703	3	56
12	GO:0006508	proteolysis	4.52e-05	0.003088	0.02251	0.03706	9	1697
13	GO:0051918	negative regulation of fibrinolysis	5.42e-05	0.003419	0.02491	0.04445	2	10

## Sheet: cae1.9_down_pathway
	ID	Name	Source	pValue	FDR B&H	FDR B&Y	Bonferroni	Genes from Input	Genes in Annotation
1	M3468	Genes encoding enzymes and their regulators involved in the remodeling of the extracellular matrix	MSigDB C2 BIOCARTA (v6.0)	2.273e-08	3.659e-06	2.071e-05	3.659e-06	7	238
2	P00050	Plasminogen activating cascade	PantherDB	1.704e-06	0.0001372	0.0007766	0.0002743	3	17
3	83073	Complement and coagulation cascades	BioSystems: KEGG	4.295e-06	0.0002305	0.001305	0.0006914	4	79
4	1269367	Platelet degranulation	BioSystems: REACTOME	3.292e-05	0.001227	0.006945	0.005301	4	132
5	1269365	Response to elevated platelet cytosolic Ca2+	BioSystems: REACTOME	3.809e-05	0.001227	0.006945	0.006133	4	137
6	M5885	Ensemble of genes encoding ECM-associated proteins including ECM-affilaited proteins, ECM regulators and secreted factors	MSigDB C2 BIOCARTA (v6.0)	5.086e-05	0.001365	0.007727	0.008189	7	753
7	1269372	Dissolution of Fibrin Clot	BioSystems: REACTOME	0.0001526	0.003509	0.01987	0.02456	2	13

## Sheet: cae1.11.9up_BP_enrichment
	ID	Name	pValue	FDR B&H	FDR B&Y	Bonferroni	Genes from Input	Genes in Annotation
1	GO:0015671	oxygen transport	7.415e-07	0.0007118	0.005299	0.0007118	3	15
2	GO:0015669	gas transport	2.868e-06	0.00119	0.008858	0.002753	3	23
3	GO:0042744	hydrogen peroxide catabolic process	3.718e-06	0.00119	0.008858	0.003569	3	25
4	GO:0010951	negative regulation of endopeptidase activity	1.049e-05	0.002517	0.01874	0.01007	5	245
5	GO:0010466	negative regulation of peptidase activity	1.322e-05	0.002538	0.01889	0.01269	5	257
6	GO:0015701	bicarbonate transport	2.257e-05	0.003612	0.02689	0.02167	3	45
7	GO:0042743	hydrogen peroxide metabolic process	3.105e-05	0.003967	0.02953	0.02981	3	50
8	GO:0006898	receptor-mediated endocytosis	3.306e-05	0.003967	0.02953	0.03173	5	311
9	GO:0010035	response to inorganic substance	4.648e-05	0.004958	0.03691	0.04462	6	559

[truncated: 3 more sheets: cae1.11.9_up_pathway, cae1.11.9down_BP_enrichment, cae1.11.9_down_pathway]
